# Supplementary material for: Adenosine-generating ovarian cancer cells attract myeloid cells which differentiate into adenosine-generating tumor associated macrophages – a self-amplifying, CD39- and CD73-dependent mechanism for tumor immune escape
Source: J Immunother Cancer. 2016 Aug 16;4:49. doi: 10.1186/s40425-016-0154-9 (PMC4986205; doi:10.1186/s40425-016-0154-9)
Supplement: Additional file 2: Table S1. — KEGG pathway analysis using the R2 pathway finder. List of pathways significantly correlated with the expression of CD39 or CD73 and their respective p values. (DOCX 15 kb) [file 40425_2016_154_MOESM2_ESM.docx]

## Supplemental Table 1

| **CD39 ( ENTPD1)** | | **CD73 (NT5E)** | |
| --- | --- | --- | --- |
| **Pathway** | **p** | **Pathway** | **p** |
| Osteoclast differentiation | **6.1x10-09** | Focal adhesion | **1.2x10-05** |
| Ribosome | **7.9x10-08** | Osteoclast differentiation | **1.7x10-05** |
| Phagosome | **9.7x10-07** | Phagosome | **2.8x10-05** |
| **Antigen processing and presentation** | **1.5x10-05** | Cytokine-cytokine receptor interaction | **4.3x10-05** |
| Cell adhesion molecules | **4.4x10-05** | Cell cycle | **1.1x10-04** |
| Intestinal immune network for IgA production | **5.4x10-05** | Proteoglycans in cancer | **1.1x10-04** |
| Lysosome | **6.1x10-05** | Natural killer cell mediated cytotoxicity | **1.7x10-04** |
| TNF signaling pathway | **1.9x10-04** | Pyrimidine metabolism | **3.2x10-04** |
| NF-B signaling pathway | **2.0x10-04** | DNA replication | **3.9x10-04** |
| NOD-like receptor signaling pathway | **3.7x10-04** | ECM-receptor interaction | **4.7x10-04** |
| Primary immunodeficiency | **9.0x10-04** | TNF-signaling pathway | **4.9x10-04** |
|  |  | Chemokine signaling pathway | **8.6x10-04** |
| ECM-receptor interaction | **1.6x10-03** | Base excision repair | **9.6x10-04** |
| Natural killer cell mediated cytotoxicity | **4.4x10-03** | **Antigen processing and presentation** | **1.6x10-03** |
| Toll-like receptor signaling pathway | **4.9x10-03** | Leukocyte transendothelial migration | **1.9x10-03** |
| TGF-beta signaling pathway | **7.5x10-03** | Hematopoietic cell lineage | **2.0x10-03** |
| Cytokine-cytokine receptor interaction | **7.9x10-03** | Regulation of actin cytoskeleton | **3.3x10-03** |
| Leukocyte transendothelial migration | **8.3x10-03** | Prostate cancer | **3.5x10-03** |
|  |  | Pathways in cancer | **3.8x10-03** |
|  |  | T cell receptor signaling pathway | **5.6x10-03** |
|  |  | B cell receptor signaling pathway | **7.8x10-03** |
|  |  | PI3K-Akt signaling pathway | **8.3x10-03** |
|  |  | MicroRNAs in cancer | **8.7x10-03** |

**Supplemental Table 1:** **KEGG pathway analysis using the R2 pathway finder**. List of pathways significantly correlated with the expression of CD39 or CD73 and their respective p values.
